# Supplementary material for: Salt marsh sediment bacterial communities maintain original population structure after transplantation across a latitudinal gradient
Source: PubMed Central journal article supplement (PMC5935077; doi:10.7717/peerj.4735), 2018-05-01

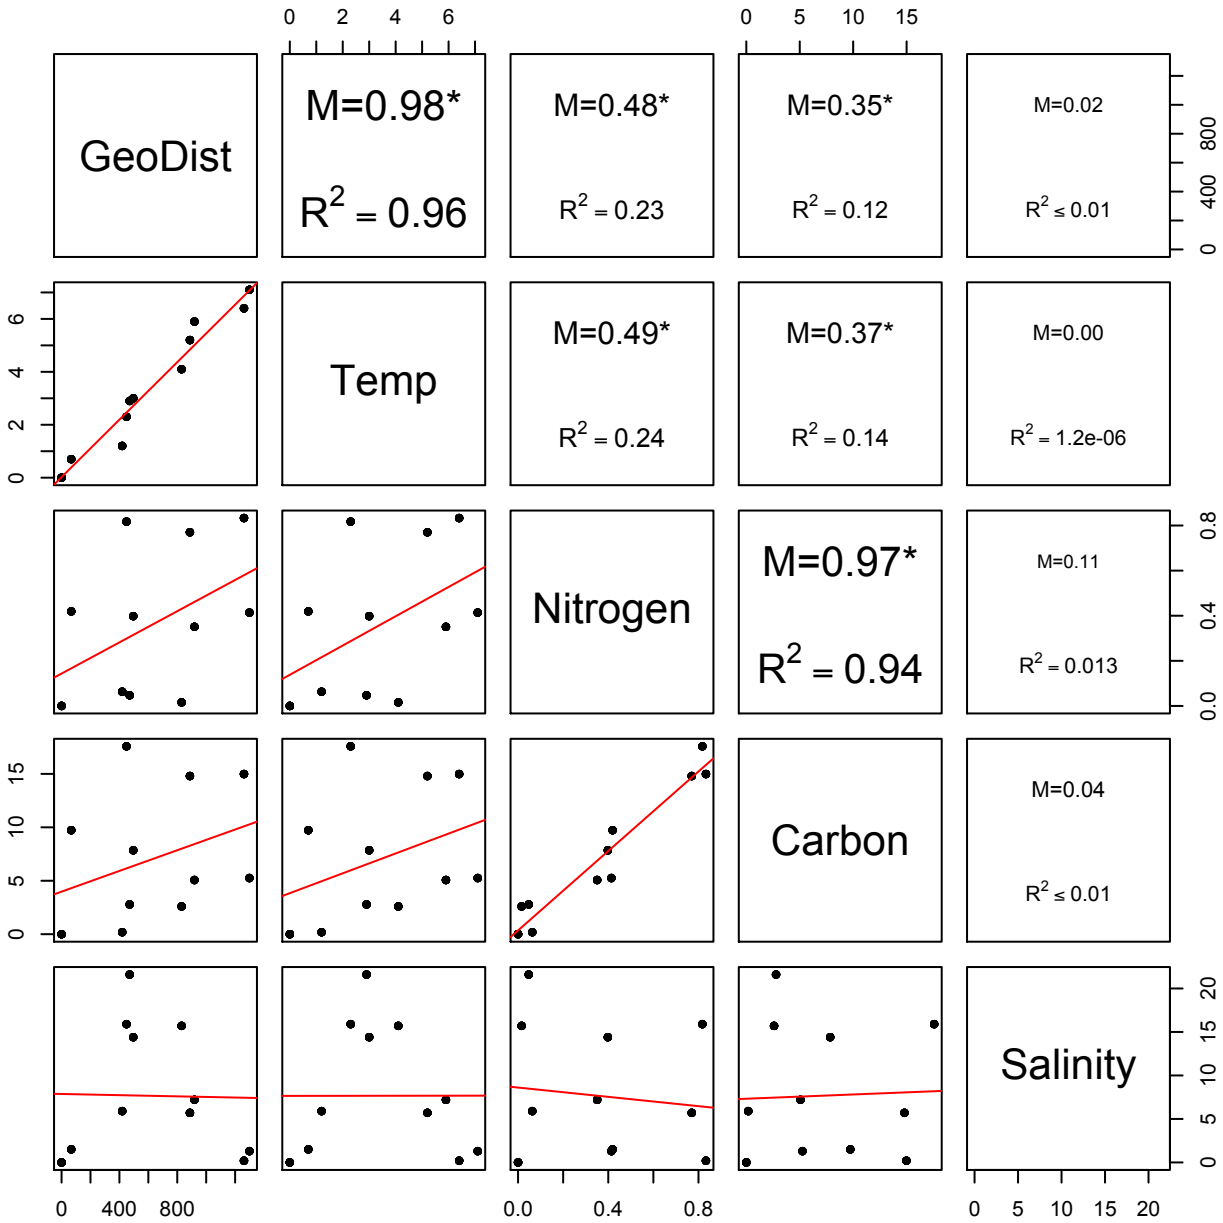

Supplement: peerj-06-4735-s001.pdf [file peerj-06-4735-s001.pdf]
