# Supplementary material for: Salt marsh sediment bacterial communities maintain original population structure after transplantation across a latitudinal gradient
Source: PubMed Central journal article supplement (PMC5935077; doi:10.7717/peerj.4735), 2018-05-01
Supplement: peerj-06-4735-s005.pdf [file peerj-06-4735-s005.pdf]

| QIIME OTU# | Indicator OTU Taxonomy                                                                                      | Env Variable  | Slope | R-squared | p-value  |
|------------|-------------------------------------------------------------------------------------------------------------|---------------|-------|-----------|----------|
| 21858      | Bacteria; Chloroflexi; Anaerolineae; Anaerolineales; Anaerolineaceae                                        | deltaN        | -1.64 | 0.59      | 2.34E-15 |
| 21858      | Bacteria; Chloroflexi; Anaerolineae; Anaerolineales; Anaerolineaceae                                        | deltaTemp     | 4.01  | 0.46      | 4.94E-11 |
| 32074      | Bacteria; Proteobacteria; Gammaproteobacteria; Vibrionales; Vibrionaceae; Vibrio                            | deltaTemp     | -3.53 | 0.41      | 8.66E-10 |
| 13670      | Bacteria; Proteobacteria; Deltaproteobacteria; Desulfobacterales; Desulfobacteraceae                        | deltaN        | -1.22 | 0.41      | 1.29E-09 |
| 39777      | Bacteria; Chloroflexi; Anaerolineae; Anaerolineales; Anaerolineaceae; Belliilinea                           | deltaTemp     | 3.55  | 0.37      | 8.55E-09 |
| 32074      | Bacteria; Proteobacteria; Gammaproteobacteria; Vibrionales; Vibrionaceae; Vibrio                            | deltaN        | 1.21  | 0.37      | 8.91E-09 |
| 18564      | Bacteria; Acidobacteria; Acidobacteria; Acidobacteriales; Acidobacteriaceae                                 | deltaN        | -1.12 | 0.36      | 1.78E-08 |
| 18564      | Bacteria; Acidobacteria; Acidobacteria; Acidobacteriales; Acidobacteriaceae                                 | deltaTemp     | 2.86  | 0.30      | 4.23E-07 |
| 39777      | Bacteria; Chloroflexi; Anaerolineae; Anaerolineales; Anaerolineaceae; Belliilinea                           | deltaN        | -1.14 | 0.30      | 5.27E-07 |
| 31042      | Bacteria; Proteobacteria; Gammaproteobacteria; Thiotrichales; Piscirickettsiaceae; Mariprofundus            | deltaSalinity | -2.71 | 0.29      | 6.97E-07 |
| 50561      | Bacteria; Chloroflexi; Anaerolineae; Anaerolineales                                                         | deltaTemp     | 4.46  | 0.29      | 7.88E-07 |
| 6580       | Bacteria; Bacteroidetes; Sphingobacteria; Sphingobacteriales                                                | deltaN        | -1.52 | 0.28      | 1.59E-06 |
| 15121      | Bacteria; WS3                                                                                               | deltaN        | -1.14 | 0.27      | 2.59E-06 |
| 7363       | Bacteria; Planctomycetes; Phycisphaerae                                                                     | deltaSalinity | -0.94 | 0.27      | 2.73E-06 |
| 62033      | Bacteria; Chloroflexi; Anaerolineae; Anaerolineales                                                         | deltaN        | -1.36 | 0.26      | 3.90E-06 |
| 62033      | Bacteria; Chloroflexi; Anaerolineae; Anaerolineales                                                         | deltaTemp     | 3.75  | 0.26      | 4.60E-06 |
| 13670      | Bacteria; Proteobacteria; Deltaproteobacteria; Desulfobacterales; Desulfobacteraceae                        | deltaTemp     | 2.69  | 0.26      | 4.65E-06 |
| 47211      | Bacteria; Proteobacteria; Deltaproteobacteria; Desulfobacterales; Desulfobacteraceae                        | deltaSalinity | -0.86 | 0.25      | 6.21E-06 |
| 28760      | Bacteria; Proteobacteria; Deltaproteobacteria; Desulfarculales; Desulfarculaceae                            | deltaTemp     | 4.55  | 0.25      | 7.46E-06 |
| 1399       | Bacteria; Bacteroidetes; Sphingobacteria; Sphingobacteriales                                                | deltaN        | -1.57 | 0.24      | 8.90E-06 |
| 62643      | Bacteria                                                                                                    | deltaN        | -0.86 | 0.22      | 2.70E-05 |
| 50561      | Bacteria; Chloroflexi; Anaerolineae; Anaerolineales                                                         | deltaN        | -1.39 | 0.22      | 2.89E-05 |
| 7363       | Bacteria; Planctomycetes; Phycisphaerae                                                                     | deltaN        | -0.87 | 0.22      | 2.96E-05 |
| 46703      | Bacteria; Proteobacteria; Deltaproteobacteria; Desulfuromonadales; Desulfuromonadaceae; Desulfuromusa       | deltaTemp     | 3.82  | 0.22      | 2.98E-05 |
| 55979      | Bacteria; Proteobacteria; Deltaproteobacteria; Desulfobacterales; Desulfobulbaceae                          | deltaTemp     | 4.01  | 0.22      | 3.07E-05 |
| 32072      | Bacteria; Proteobacteria; Gammaproteobacteria; Alteromonadales; Shewanellaceae; Shewanella                  | deltaN        | 1.41  | 0.22      | 3.28E-05 |
| 23473      | Bacteria; Proteobacteria; Deltaproteobacteria; Desulfobacterales; Desulfobacteraceae                        | deltaN        | -0.97 | 0.21      | 4.47E-05 |
| 20646      | Bacteria; Chlorobi; Chlorobia; Chlorobiales                                                                 | deltaTemp     | 4.56  | 0.21      | 4.98E-05 |
| 20646      | Bacteria; Chlorobi; Chlorobia; Chlorobiales                                                                 | deltaN        | -1.64 | 0.21      | 5.42E-05 |
| 35044      | Bacteria; Deferribacteres; Deferribacteres; Deferribacterales; Unassigned; Caldithrix                       | deltaSalinity | -1.26 | 0.21      | 5.46E-05 |
| 34997      | Bacteria; Proteobacteria; Deltaproteobacteria; Syntrophobacterales; Syntrophaceae; Desulfobacca             | deltaTemp     | 3.30  | 0.21      | 5.64E-05 |
| 52530      | Bacteria; WS3                                                                                               | GeoDist       | -2.36 | 0.20      | 5.89E-05 |
| 10059      | Bacteria; Proteobacteria; Deltaproteobacteria; Desulfarculales; Desulfarculaceae                            | deltaN        | -0.69 | 0.20      | 6.09E-05 |
| 23410      | Bacteria; Proteobacteria; Gammaproteobacteria; Acidithiobacillales; Acidithiobacillaceae; Acidithiobacillus | deltaSalinity | -1.05 | 0.20      | 6.50E-05 |
| 50299      | Bacteria; Proteobacteria; Deltaproteobacteria; Desulfobacterales; Desulfobacteraceae                        | deltaN        | -1.00 | 0.20      | 6.84E-05 |
| 9333       | Bacteria; Deferribacteres; Deferribacteres; Deferribacterales; Unassigned; Caldithrix                       | deltaN        | -0.87 | 0.20      | 7.14E-05 |
| 15121      | Bacteria; WS3                                                                                               | deltaTemp     | 2.69  | 0.19      | 9.60E-05 |
| 28853      | Bacteria; Chloroflexi; Dehalococcoidetes; Unassigned; Unassigned; Dehalogenimonas                           | deltaTemp     | 2.24  | 0.19      | 9.81E-05 |
| 10080      | Bacteria; Bacteroidetes; Sphingobacteria; Sphingobacteriales                                                | deltaSalinity | -1.18 | 0.19      | 1.07E-04 |
| 28760      | Bacteria; Proteobacteria; Deltaproteobacteria; Desulfarculales; Desulfarculaceae                            | deltaN        | -1.43 | 0.19      | 1.28E-04 |
| 45571      | Bacteria; Proteobacteria; Gammaproteobacteria; Acidithiobacillales; Acidithiobacillaceae; Acidithiobacillus | deltaSalinity | -1.61 | 0.19      | 1.30E-04 |
| 32068      | Bacteria; Proteobacteria; Gammaproteobacteria; Oceanospirillales; Oceanospirillaceae; Marinomonas           | deltaN        | 1.31  | 0.19      | 1.37E-04 |
| 42445      | Bacteria; Planctomycetes; Phycisphaerae                                                                     | deltaTemp     | 4.76  | 0.18      | 1.55E-04 |
| 27155      | Bacteria; Deferribacteres; Deferribacteres; Deferribacterales; Unassigned; Caldithrix                       | deltaSalinity | -1.88 | 0.18      | 1.66E-04 |
| 13729      | Bacteria; Planctomycetes; Phycisphaerae                                                                     | deltaTemp     | 2.15  | 0.18      | 1.91E-04 |
| 53715      | Bacteria; Bacteroidetes; Sphingobacteria; Sphingobacteriales                                                | deltaSalinity | -0.99 | 0.18      | 2.10E-04 |
| 28853      | Bacteria; Chloroflexi; Dehalococcoidetes; Unassigned; Unassigned; Dehalogenimonas                           | deltaN        | -0.77 | 0.18      | 2.12E-04 |
| 27405      | Bacteria; Acidobacteria; Acidobacteria; Acidobacteriales; Acidobacteriaceae                                 | deltaN        | -0.63 | 0.17      | 2.70E-04 |
| 1399       | Bacteria; Bacteroidetes; Sphingobacteria; Sphingobacteriales                                                | deltaTemp     | 3.63  | 0.17      | 2.83E-04 |
| 59708      | Bacteria; Proteobacteria; Deltaproteobacteria; Desulfobacterales; Desulfobacteraceae                        | deltaSalinity | -1.22 | 0.17      | 2.83E-04 |
| 42445      | Bacteria; Planctomycetes; Phycisphaerae                                                                     | deltaN        | -1.64 | 0.17      | 3.15E-04 |
| 6585       | Bacteria; Spirochaetes; Spirochaetes; Spirochaetales; Spirochaetaceae; Spirochaeta                          | deltaN        | -0.52 | 0.17      | 3.20E-04 |
| 45571      | Bacteria; Proteobacteria; Gammaproteobacteria; Acidithiobacillales; Acidithiobacillaceae; Acidithiobacillus | deltaN        | -1.56 | 0.17      | 3.39E-04 |
| 23473      | Bacteria; Proteobacteria; Deltaproteobacteria; Desulfobacterales; Desulfobacteraceae                        | deltaTemp     | 2.38  | 0.17      | 3.52E-04 |
| 53114      | Bacteria; Chloroflexi; Dehalococcoidetes; Unassigned; Unassigned; Dehalogenimonas                           | deltaTemp     | 2.18  | 0.16      | 3.75E-04 |
| 22720      | Bacteria; Firmicutes; Clostridia; Clostridiales; Ruminococcaceae; Acetivibrio                               | deltaSalinity | -0.57 | 0.16      | 3.78E-04 |
| 10059      | Bacteria; Proteobacteria; Deltaproteobacteria; Desulfarculales; Desulfarculaceae                            | deltaTemp     | 1.70  | 0.16      | 4.06E-04 |
| 50299      | Bacteria; Proteobacteria; Deltaproteobacteria; Desulfobacterales; Desulfobacteraceae                        | deltaSalinity | -0.87 | 0.16      | 4.13E-04 |
| 10348      | Bacteria; Proteobacteria; Gammaproteobacteria; Chromatiales; Chromatiaceae; Nitrosococcus                   | deltaN        | -1.42 | 0.16      | 4.63E-04 |
| 6580       | Bacteria; Bacteroidetes; Sphingobacteria; Sphingobacteriales                                                | deltaTemp     | 3.18  | 0.16      | 4.95E-04 |
| 8983       | Bacteria; Chlorobi; Chlorobia; Chlorobiales                                                                 | deltaSalinity | -1.39 | 0.15      | 6.84E-04 |
| 13729      | Bacteria; Planctomycetes; Phycisphaerae                                                                     | deltaN        | -0.71 | 0.15      | 7.70E-04 |
| 43234      | Bacteria; Proteobacteria; Deltaproteobacteria; Desulfarculales; Desulfarculaceae                            | deltaTemp     | 1.41  | 0.15      | 7.87E-04 |
| 50708      | Bacteria; Chloroflexi; Dehalococcoidetes; Unassigned; Unassigned; Dehalogenimonas                           | deltaTemp     | 1.57  | 0.15      | 7.94E-04 |
| 53715      | Bacteria; Bacteroidetes; Sphingobacteria; Sphingobacteriales                                                | deltaN        | -0.92 | 0.15      | 8.38E-04 |
| 9333       | Bacteria; Deferribacteres; Deferribacteres; Deferribacterales; Unassigned; Caldithrix                       | deltaTemp     | 2.05  | 0.15      | 8.53E-04 |
| 40391      | Bacteria; Spirochaetes; Spirochaetes; Spirochaetales; Spirochaetaceae; Spirochaeta                          | deltaN        | -0.91 | 0.15      | 8.82E-04 |
| 46703      | Bacteria; Proteobacteria; Deltaproteobacteria; Desulfuromonadales; Desulfuromonadaceae; Desulfuromusa       | deltaN        | -1.12 | 0.14      | 8.92E-04 |
| 29982      | Bacteria; Proteobacteria; Deltaproteobacteria; Desulfarculales; Desulfarculaceae                            | deltaTemp     | 2.49  | 0.14      | 9.15E-04 |
| 31973      | Bacteria; Proteobacteria; Deltaproteobacteria; Desulfarculales; Desulfarculaceae                            | deltaN        | -0.39 | 0.14      | 9.17E-04 |
| 28873      | Bacteria; Spirochaetes; Spirochaetes; Spirochaetales; Spirochaetaceae; Spirochaeta                          | deltaN        | -0.64 | 0.14      | 9.90E-04 |
| 59056      | Bacteria; Proteobacteria; Deltaproteobacteria; Desulfobacterales; Desulfobacteraceae                        | deltaSalinity | -1.09 | 0.14      | 9.90E-04 |

•••
